# Supplementary material for: Sutureless aortic valve replacement versus transcatheter aortic valve implantation: a meta-analysis of comparative matched studies using propensity score matching
Source: Oxford University Press journal article supplement (doi:10.1093/icvts/ivx294), 2017-08-11
Supplement: supplementary_material_ivx294.pdf [file supplementary_material_ivx294.pdf]

Electronic supplementary material

Figure S1: Quality assessment of the included studies

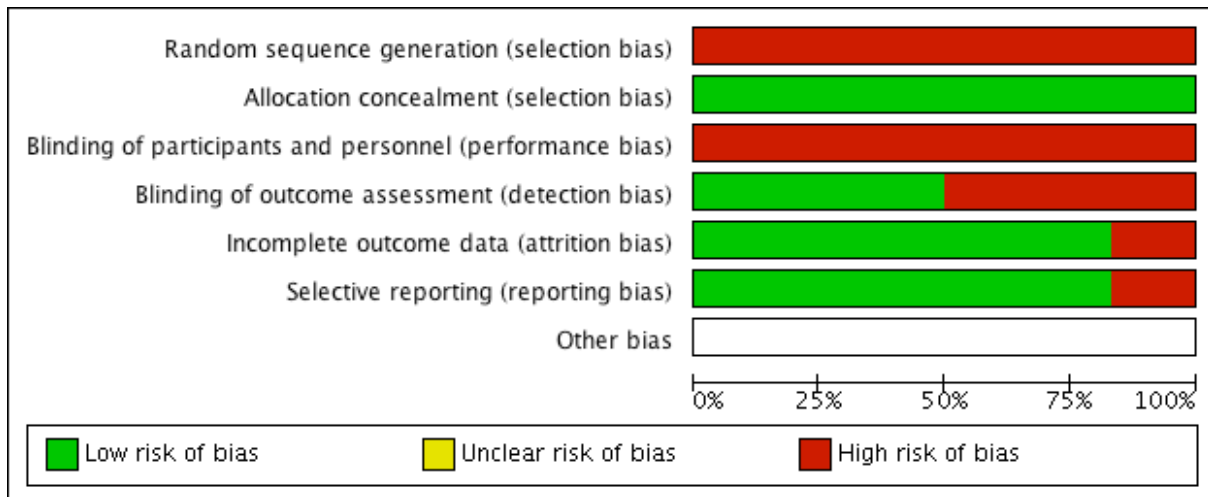

Figure S3: Forrest plot of preoperative left ventricle ejection fraction

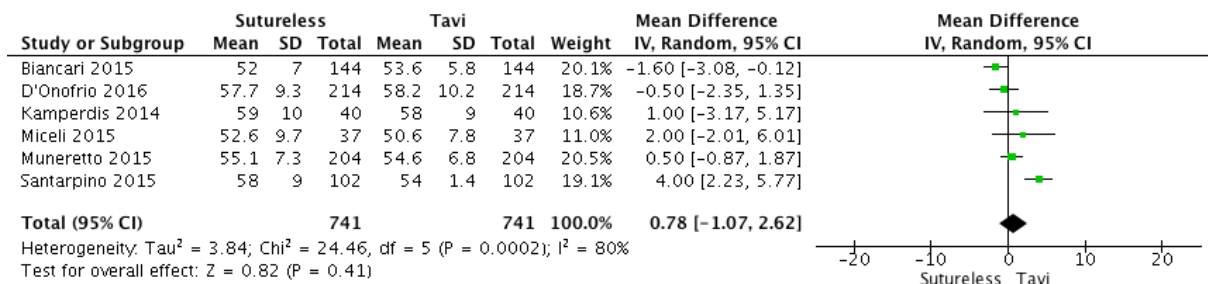

Figure S4: Forrest plot of preoperative renal failure

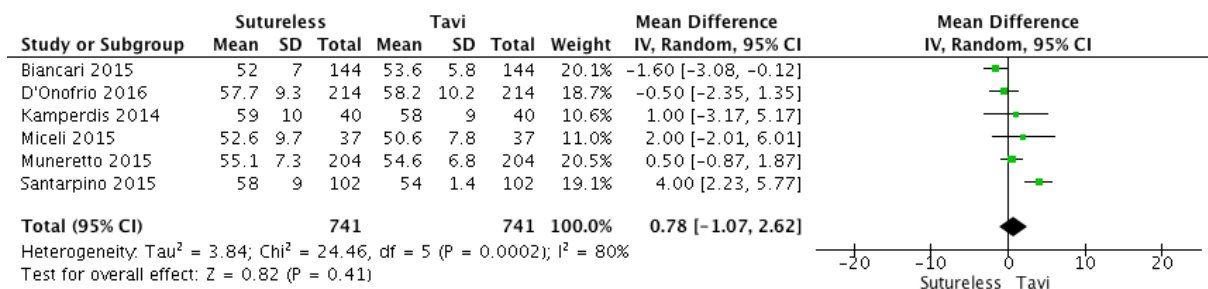

Figure S5: Forrest plot of patients' gender

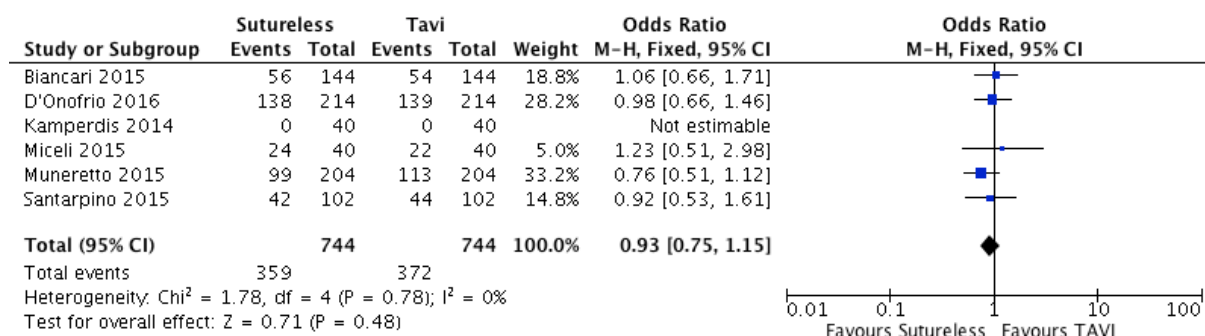

Figure S6: Forrest plot of REDO patients

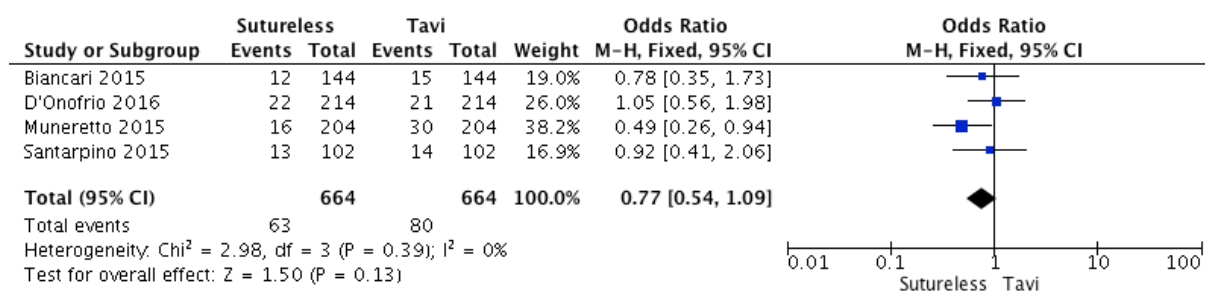

Figure S7: Forrest plot preoperative age

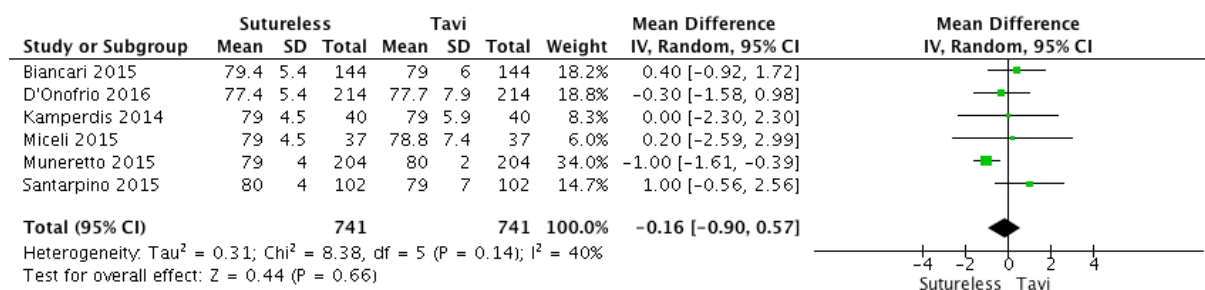

Figure S8: Forrest plot of preoperative EuroSCORE

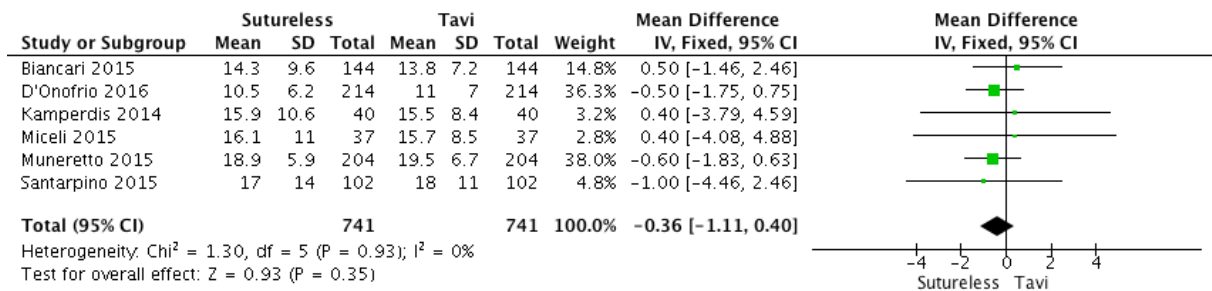

Figure S9: Forrest plot of preoperative diabetes

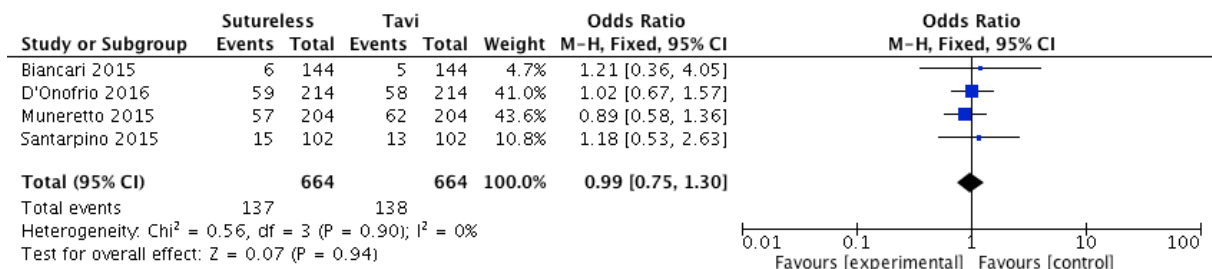

Figure S10: Forrest plot of preoperative CAD

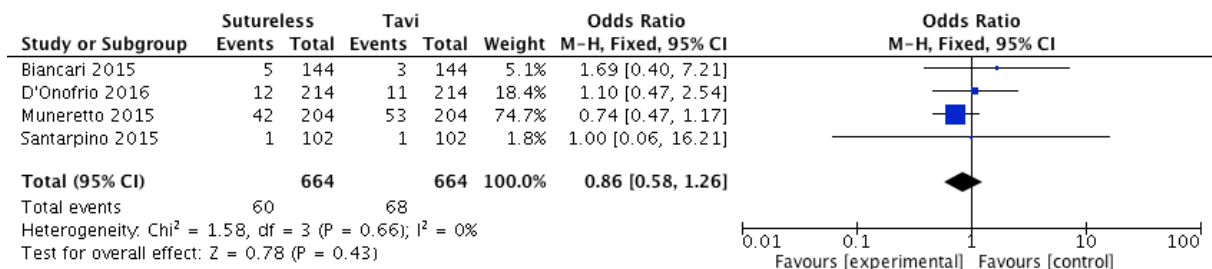

Figure S11: Forrest plot of preoperative extracardiac arteriopathy

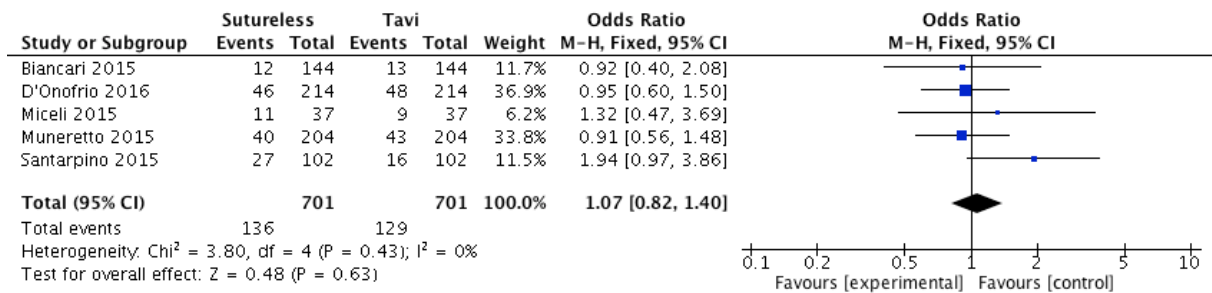

Figure S12: Forrest plot of NYHA class III-IV

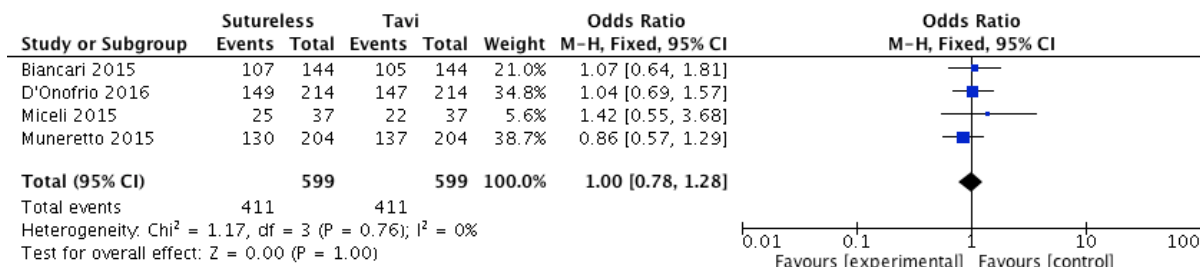

Figure S14: Metaregression evaluating the relation between postoperative mortality and postoperative aortic regurgitation and between postoperative mortality and postprocedural stroke

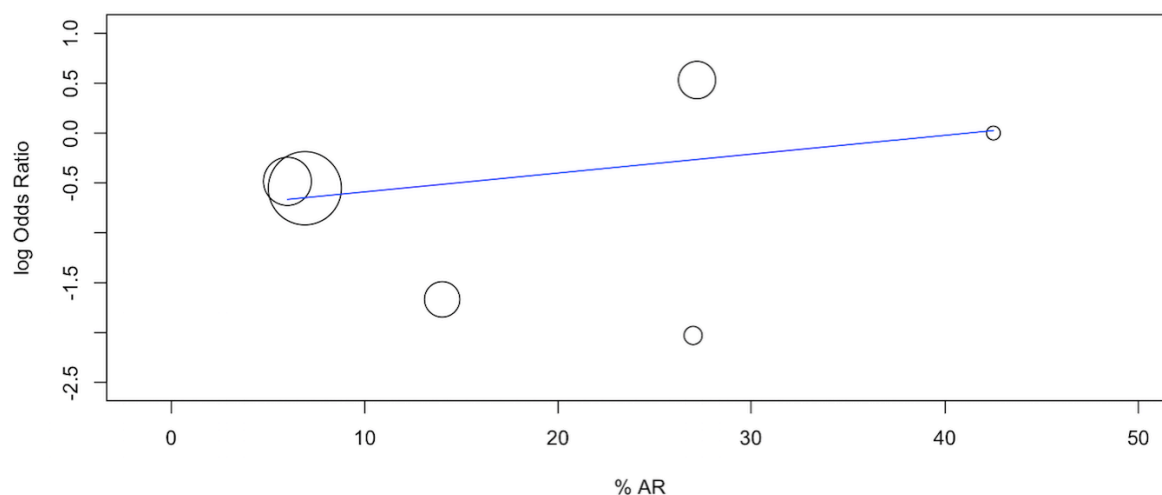

| Covariate       | Coefficients | Lower bound | Upper bound | Std. error | p-Value |
|-----------------|--------------|-------------|-------------|------------|---------|
| Intercept       | -0.779       | -1.648      | 0.090       | 0.443      | 0.079   |
| % AR            | 0.019        | -0.042      | 0.080       | 0.031      | 0.543   |
| Omnibus p-Value | 0.543        |             |             |            |         |

Figure S17: Metaregression evaluating the relation between postoperative stroke and postoperative aortic regurgitation and postoperative aortic regurgitation and acute kidney injury

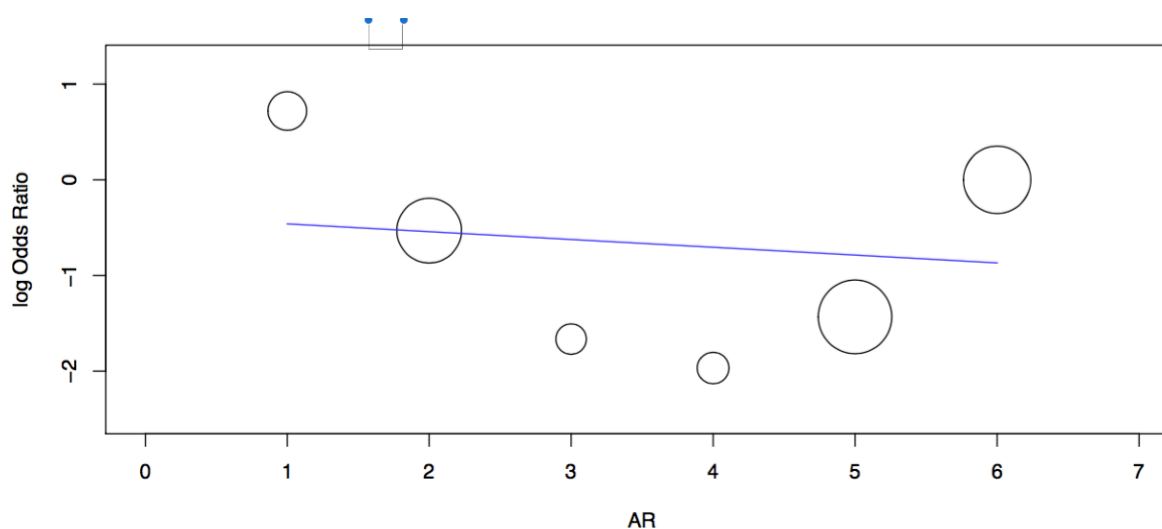

| Covariate | Coefficients | Lower bound | Upper bound | Std. error | p-Value |
|-----------|--------------|-------------|-------------|------------|---------|
| Intercept | -0.379       | -2.158      | 1.399       | 0.907      | 0.676   |
| AR        | -0.082       | -0.485      | 0.322       | 0.206      | 0.692   |

Omnibus p-Value 0.692
